# Supplementary material
Source: publisher figshare collection journal article supplement (https://gsajournals.figshare.com/ndownloader/files/28638063)
Supplement: Supplementary file 1 [file 28638063]

Genotype	SNP1	SNP2	SNP3	SNP4	SNP5	SNP6	SNP7	SNP8	SNP9	SNP10	SNP11	SNP12	SNP13	SNP14	SNP15	SNP16	SNP17	SNP18	SNP19	SNP20	SNP21	SNP22	SNP23	SNP24	SNP25	SNP26	SNP27	SNP28	SNP29	SNP30	SNP31	SNP32	SNP33	SNP34	SNP35	SNP36	SNP37	SNP38	SNP39	SNP40	SNP41	SNP42	SNP43	SNP44	SNP45	SNP46	SNP47	SNP48	SNP49
646	0	0	0	2	0	0	0	0	0	0	0	1	1	1	1	1	1	1	0	0	1	0	0	1	1	0	0	0	1	0	0	0	1	0	0	0	0	0	0	0	0	0	0	1	1	1	1	1	1
527	0	0	0	2	0	0	0	0	0	0	0	1	1	1	1	1	1	1	0	0	1	1	1	1	0	0	1	1	0	0	2	0	0	0	0	0	2	0	0	0	0	1	1	0	0	1	1	0	1
638	0	0	0	2	0	0	0	0	0	1	0	0	0	1	1	0	0	0	0	2	0	0	0	1	0	0	0	0	0	0	0	0	0	1	0	0	0	0	1	1	0	0	0	1	0	1	1	1	1
647	0	0	0	2	0	0	0	0	0	0	0	1	1	1	1	1	1	1	0	0	1	0	1	1	0	0	1	1	0	0	2	0	0	0	0	0	2	0	0	0	0	1	1	0	0	1	1	0	1
640	0	0	0	2	0	0	0	0	0	0	0	1	1	1	1	1	1	1	0	1	1	0	0	1	0	0	1	1	0	0	1	0	0	1	0	0	0	0	1	1	0	1	0	1	0	1	1	1	1
610	0	0	0	2	0	0	0	0	0	0	0	1	1	1	1	1	1	1	0	1	1	1	0	1	0	0	1	1	0	0	1	0	0	1	0	0	0	0	1	1	0	1	0	1	0	1	1	1	1
654	0	0	0	2	0	0	0	0	0	0	0	1	1	1	1	1	1	1	0	0	1	1	1	1	0	0	1	1	0	0	2	0	0	0	0	0	1	0	0	0	0	0	1	0	0	1	1	0	1
631	0	0	0	2	0	0	0	0	0	1	0	0	0	1	1	0	0	0	0	1	0	0	1	1	0	0	1	1	0	0	2	0	0	0	0	0	2	0	0	0	0	1	1	0	0	1	1	0	1
622	0	0	0	2	0	0	0	0	0	1	0	0	0	1	1	0	0	0	0	1	0	0	1	1	0	0	1	1	0	0	0	0	0	1	0	0	0	5	1	1	0	0	0	1	0	1	1	0	1
668	0	1	0	1	0	0	1	0	0	5	0	2	2	0	0	1	2	2	1	1	0	1	0	0	1	0	1	1	0	0	0	0	1	1	1	0	0	0	0	0	0	0	1	0	0	1	1	1	1
669	1	1	1	1	1	0	0	0	5	0	1	0	0	1	1	0	0	0	5	0	0	1	0	1	0	0	1	1	2	0	0	0	1	1	0	0	0	0	2	2	0	0	1	0	1	1	1	0	1
427	0	0	0	2	0	0	0	0	1	0	0	2	2	0	0	1	2	2	0	0	0	0	0	1	0	0	0	0	1	0	0	0	0	1	0	0	0	0	1	1	0	0	1	0	0	1	1	0	1
430	0	0	0	1	0	0	1	0	2	0	1	2	2	0	0	1	2	2	1	0	0	2	0	0	0	0	0	0	2	0	1	0	1	0	0	0	0	0	5	5	5	0	1	1	1	1	1	1	1
670	0	0	0	1	0	0	1	0	1	0	1	1	1	1	1	1	1	1	1	1	0	1	0	0	0	0	0	0	2	0	1	0	1	0	0	0	0	0	1	1	0	0	1	1	1	1	1	0	1
671	0	0	0	1	0	0	1	0	1	0	0	1	1	1	1	1	1	1	1	1	0	1	0	0	0	0	0	0	2	0	1	0	1	0	0	0	0	0	1	1	0	0	1	1	1	1	1	0	1
431	0	0	0	2	0	0	0	0	2	0	0	0	0	2	2	0	0	0	0	2	0	0	0	0	0	0	0	0	2	0	0	0	0	0	0	0	0	0	1	1	0	0	1	1	1	1	1	1	1
432	0	0	0	2	0	0	0	0	2	0	0	0	0	2	2	0	0	0	2	0	0	1	0	0	0	0	0	0	2	0	5	5	0	0	0	0	5	0	0	0	0	0	2	0	1	1	1	0	1
433	0	0	0	1	0	0	1	0	2	0	1	1	1	1	1	1	1	1	1	1	0	2	0	0	0	0	0	0	2	0	1	0	1	0	0	0	0	0	1	1	0	0	1	1	1	1	1	1	1
437	0	0	0	2	0	0	0	0	5	0	0	1	1	1	1	0	1	1	0	0	0	0	0	2	0	0	0	0	0	0	0	0	0	2	1	0	0	0	0	0	0	1	1	0	0	1	1	0	1
440	0	0	0	1	0	0	0	0	0	0	0	1	1	0	0	1	1	1	0	1	0	0	0	0	0	0	0	0	1	0	0	0	0	0	0	0	0	0	1	1	0	0	1	0	1	1	1	1	1
441	0	0	0	2	0	0	0	0	0	0	0	1	1	0	0	1	1	1	0	1	0	0	0	0	0	0	0	0	1	0	1	0	0	1	0	0	0	0	0	0	0	0	0	0	1	1	1	0	1
442	0	0	0	0	0	0	0	0	0	0	1	1	1	0	0	1	1	1	0	1	2	1	0	1	0	0	0	0	2	0	1	0	0	1	0	0	0	0	0	0	0	0	0	0	1	1	1	1	1
672	0	0	0	0	0	0	0	0	0	0	1	2	2	0	0	2	2	2	0	1	2	1	0	1	0	0	0	0	2	0	0	0	0	1	0	0	0	0	1	1	0	0	1	0	1	1	1	0	1
445	0	0	0	2	0	0	0	5	5	5	5	2	2	0	0	2	2	2	5	5	1	0	0	0	0	0	5	5	2	0	5	5	0	1	0	0	0	0	2	2	0	5	5	5	5	5	0	0	0
447	1	1	1	0	0	1	0	1	0	0	1	1	1	0	0	1	1	1	0	1	1	1	0	0	0	0	0	0	1	0	1	0	0	1	0	0	0	5	1	1	0	0	1	0	1	1	1	1	1
673	1	1	1	0	0	1	0	1	0	0	1	1	1	0	0	1	1	1	0	2	1	1	0	0	0	0	0	0	1	0	1	0	0	1	0	0	0	5	1	1	0	0	1	0	1	1	1	1	1
448	0	0	0	1	0	1	0	1	0	0	0	1	1	0	0	1	1	1	0	2	0	0	0	0	1	0	0	0	0	0	1	0	0	0	0	0	0	0	1	1	0	0	1	0	1	1	1	1	1
449	0	0	0	1	0	1	0	1	0	0	0	1	1	0	0	1	1	1	0	1	0	0	0	0	0	0	0	0	0	0	1	0	0	0	0	0	0	0	1	1	0	0	1	0	1	1	1	1	1
450	1	1	1	1	0	1	0	1	0	0	0	1	1	0	0	1	1	1	0	2	0	0	0	0	1	0	0	0	0	0	1	0	0	0	0	0	0	0	1	1	0	0	1	0	1	1	1	1	1
451	0	0	0	1	0	1	0	1	0	0	1	2	2	0	0	2	2	2	0	2	1	1	0	0	0	0	1	1	1	0	1	0	0	1	0	0	0	0	1	1	0	0	1	0	1	1	1	0	1
452	0	0	0	0	0	1	0	1	0	0	1	1	1	0	0	1	1	1	0	1	1	0	0	0	0	0	0	0	1	0	1	0	0	1	0	0	0	0	1	1	0	0	1	0	1	1	1	1	1
453	1	1	1	1	0	1	0	1	0	0	0	1	1	0	0	1	1	1	0	2	0	1	0	0	0	0	0	0	0	0	1	0	0	0	0	0	0	1	1	1	0	0	1	0	1	1	1	1	1
455	1	1	1	1	0	1	0	1	0	0	0	1	1	0	0	1	1	1	0	2	0	0	0	0	1	0	0	0	0	0	1	0	0	0	0	0	0	0	1	1	0	0	1	0	0	1	1	1	1
674	1	1	1	0	0	1	0	1	0	0	1	1	1	0	0	1	1	1	0	2	1	1	0	0	1	0	0	0	1	0	1	0	0	1	0	0	0	0	1	1	0	0	1	0	1	1	1	1	1
460	1	1	1	1	1	0	0	0	0	1	0	0	0	0	0	0	0	0	0	2	1	0	0	0	1	0	0	0	0	0	0	0	1	1	0	0	0	0	0	0	0	0	0	0	1	1	1	1	1
641	1	1	1	1	1	1	0	1	0	0	0	0	0	1	1	0	0	0	0	0	0	1	0	0	1	1	0	0	0	1	0	0	0	1	0	1	0	0	1	1	0	0	0	1	1	1	1	0	1
463	1	1	1	1	1	1	0	1	0	0	0	0	0	1	1	0	0	0	0	1	0	1	0	0	1	1	0	0	0	1	0	0	0	0	0	0	0	0	0	0	0	0	1	0	1	1	1	0	1
464	0	0	0	1	1	1	0	1	0	0	0	0	0	1	1	0	0	0	0	1	0	0	0	0	1	1	0	0	0	1	0	0	0	0	0	0	0	0	0	0	0	0	1	0	1	1	1	0	1
466	1	1	1	0	1	1	0	1	0	0	1	0	0	2	2	0	0	0	0	1	1	1	0	0	1	1	0	0	1	1	0	0	0	0	0	0	0	0	0	0	0	0	1	0	1	1	1	0	1
469	5	5	5	0	1	1	0	1	0	0	2	0	0	0	0	0	0	0	0	1	1	1	0	0	1	1	0	0	0	1	0	1	0	1	0	1	0	0	1	1	0	0	0	1	1	1	1	1	1
470	1	1	1	0	1	1	0	1	0	0	2	0	0	0	0	0	0	0	0	1	1	2	0	0	1	1	0	0	1	1	0	1	0	2	0	1	0	0	1	1	0	0	0	1	1	1	1	1	1
675	0	0	0	1	1	1	0	1	0	0	1	0	0	0	0	0	0	0	0	1	0	0	0	0	1	1	0	0	0	1	0	1	0	1	0	1	0	0	1	1	0	0	0	1	1	1	1	0	1
472	1	1	1	1	1	1	0	5	0	0	1	0	0	0	0	0	0	0	0	1	0	1	0	0	1	1	0	0	0	1	0	0	0	0	0	0	0	0	0	0	0	0	1	0	1	1	1	0	1
473	0	0	0	2	1	1	0	1	0	0	1	0	0	0	0	0	0	0	0	1	0	0	0	0	1	1	0	0	0	1	0	1	0	1	0	1	0	0	1	1	0	0	0	1	1	1	1	1	1
676	2	2	2	0	2	2	0	1	0	0	1	0	0	0	0	0	0	0	0	1	0	0	1	0	1	1	0	0	5	5	0	1	0	1	0	1	0	0	1	1	0	0	0	1	1	1	1	1	1
477	0	0	0	2	0	0	0	0	5	0	0	2	2	0	0	1	2	2	5	5	1	5	0	1	0	0	2	0	0	0	5	5	0	2	0	2	5	0	5	5	5	0	0	0	0	0	0	1	0
481	0	0	0	1	1	1	0	1	0	0	0	2	2	0	0	1	2	2	0	1	0	1	0	0	1	0	1	0	0	0	1	0	1	1	1	0	0	0	0	0	1	1	0	0	1	1	1	0	1
677	0	0	0	2	0	0	0	0	1	0	0	0	0	2	2	0	0	0	0	1	0	1	0	1	0	0	0	0	1	1	0	0	0	1	0	0	0	0	2	2	0	0	1	1	0	1	1	1	1
678	0	0	0	1	0	0	0	0	0	0	0	1	1	0	0	1	1	1	0	1	1	0	0	1	0	0	1	1	0	0	1	0	2	0	0	0	0	0	0	0	0	0	1	0	0	1	1	0	1
487	0	0	0	1	0	0	0	0	0	0	0	2	2	0	0	1	2	2	1	1	0	0	0	2	0	0	0	0	0	0	1	0	2	1	0	0	0	0	0	0	0	0	1	0	0	1	1	0	1
679	0	1	0	0	0	0	1	0	0	0	0	2	2	0	0	2	2	2	1	1	1	1	1	0	0	0	1	0	0	0	0	0	1	1	0	0	1	0	0	0	0	0	2	0	0	1	1	0	1
491	0	0	0	1	0	0	0	0	0	0	0	1	1	1	1	1	1	1	1	0	0	0	1	1	0	0	0	0	0	0	1	0	1	0	1	0	0	0	0	0	1	1	1	0	0	1	1	0	1
492	0	1	0	1	0	0	1	0	5	0	0	2	2	0	0	2	2	2	1	1	1	1	1	0	0	0	1	0	1	0	0	0	1	1	0	0	0	0	0	0	0	0	2	0	0	0	0	0	0
493	0	1	0	0	0	0	1	0	0	0	0	2	2	0	0	2	2	2	1	1	1	0	1	0	0	0	1	0	0	0	0	0	1	1	0	0	1	0	0	0	0	0	2	0	0	1	1	0	1
494	0	0	0	1	0	0	0	0	0	0	1	1	1	1	1	0	1	1	0	1	0	0	0	2	0	0	0	0	1	0	1	0	1	0	1	0	0	0	0	0	1	1	1	0	0	0	0	0	0
495	0	1	0	0	0	0	1	0	0	0	0	2	2	0	0	2	2	2	1	1	1	1	1	0	0	0	0	0	0	0	0	0	1	1	0	0	0	0	0	0	0	0	2	0	0	1	1	0	1
496	0	1	0	0	0	0	1	0	0	0	0	2	2	0	0	2	2	2	1	1	1	1	1	0	0	0	0	0	0	0	0	0	1	1	0	0	1	0	0	0	0	0	2	0	0	1	1	1	1
680	0	0	0	2	0	0	0	0	0	0	0	2	2	0	0	2	2	2	0	1	0	0	0	0	1	0	1	1	0	0	0	0	2	0	1	0	0	0	1	1	0	0	1	0	1	1	1	0	1
681	5	5	5	0	1	2	0	2	0	0	0	0	0	2	2	0	0	0	0	0	1	0	0	1	1	1	0	0	1	1	0	0	0	0	0	0	0	0	0	0	0	0	1	0	1	1	1	1	1
650	2	2	2	0	1	2	0	5	0	0	0	0	0	2	2	0	0	0	1	0	1	2	0	1	1	1	0	0	0	0	2	0	0	0	0	0	0	0	0	0	0	0	1	0	0	1	1	1	1
501	0	0	0	2	0	0	0	0	0	0	0	2	2	0	0	2	2	2	0	1	1	0	0	1	1	0	0	0	0	0	1	0	1	0	1	0	0	0	0	0	0	1	0	0	0	1	1	0	1
502	0	0	0	1	0	0	0	0	1	0	2	0	0	1	1	0	0	0	0	0	1	0	0	0	1	1	0	0	2	0	0	0	0	1	2	0	0	0	1	1	0	0	0	1	1	1	1	0	1
503	0	0	0	1	0	0	0	0	1	0	1	0	0	1	1	0	0	0	0	0	1	0	0	0	1	1	0	0	2	0	0	0	0	1	1	0	0	0	1	1	0	0	0	1	1	1	1	1	1
682	0	0	0	2	0	0	0	0	1	1	0	0	0	1	1	0	0	0	0	1	0	0	0	1	0	0	1	1	1	0	0	0	0	1	0	0	0	1	1	1	0	0	1	0	0	1	1	0	1
508	0	0	0	1	0	0	0	0	0	1	0	1	1	0	0	1	1	1	0	1	1	0	0	1	0	0	0	0	1	1	0	0	0	1	1	0	0	0	1	1	0	0	0	1	0	1	1	0	1
663	0	0	0	1	0	0	0	1	0	2	0	0	0	0	0	0	0	0	0	1	0	1	0	0	1	0	0	0	0	0	0	0	0	1	2	0	0	1	0	0	0	0	2	0	0	1	1	0	1
513	0	0	0	0	0	0	1	0	0	1	1	1	1	0	0	1	1	1	1	0	1	2	0	1	0	0	0	0	1	0	1	0	2	0	0	0	0	0	0	0	0	0	2	0	1	1	1	1	1
514	0	0	0	2	0	0	0	0	1	0	0	0	0	2	2	0	0	0	1	1	1	1	0	1	0	0	0	0	1	0	0	0	1	0	0	0	0	0	0	0	0	0	2	0	1	1	1	0	1
517	0	0	0	0	0	0	1	5	0	0	1	1	1	0	0	1	1	1	1	0	1	2	0	1	0	0	0	0	1	0	1	0	2	0	0	0	0	0	0	0	0	0	2	0	1	1	1	0	1
518	0	0	0	2	0	0	0	0	1	0	0	0	0	2	2	0	0	0	1	1	1	1	0	0	0	0	0	0	1	0	1	0	0	0	0	0	0	0	0	0	0	0	2	0	1	1	1	1	1
519	0	0	0	1	0	0	1	0	0	0	1	1	1	1	1	1	1	1	1	1	1	2	0	0	0	0	0	0	1	0	1	0	1	0	0	0	0	0	0	0	0	0	2	0	0	1	1	0	1
611	1	1	1	0	0	1	0	0	0	0	0	2	2	0	0	2	2	2	0	0	1	0	0	1	1	0	0	0	1	0	1	0	0	1	1	0	0	5	1	1	0	1	0	1	0	1	1	1	1
683	0	0	0	0	0	0	1	0	0	0	1	1	1	0	0	1	1	1	1	0	1	1	0	1	0	0	0	0	1	0	1	0	2	0	0	0	0	0	0	0	0	0	2	0	1	1	1	0	1
684	0	0	0	2	0	0	0	5	2	0	0	0	0	2	2	0	0	0	1	1	1	2	0	0	0	0	0	0	1	0	0	0	0	0	0	0	0	0	0	0	0	0	2	0	1	1	1	0	1
520	0	0	0	2	0	0	0	0	1	0	0	0	0	2	2	0	0	0	1	1	1	2	0	1	0	0	0	0	1	0	1	0	1	0	0	0	0	0	0	0	0	0	2	0	0	1	1	1	1
521	0	0	0	2	0	0	0	0	1	0	0	0	0	2	2	0	0	0	1	1	1	1	0	0	0	0	0	0	1	0	0	0	0	0	0	0	0	0	0	0	0	0	2	0	0	1	1	0	1
522	0	0	0	0	0	0	1	0	0	0	1	1	1	0	0	1	1	1	1	0	1	2	0	0	0	0	0	0	1	0	1	0	1	0	0	0	0	0	0	0	0	0	2	0	0	1	1	0	1
363	0	0	0	2	0	0	0	0	0	0	1	1	1	0	0	1	1	1	0	0	2	0	0	1	0	0	0	0	0	0	2	0	0	0	0	0	0	0	0	0	0	1	1	0	0	1	1	1	1
364	0	0	0	2	0	0	0	0	0	0	1	1	1	0	0	1	1	1	0	0	2	0	0	1	0	0	0	0	0	0	2	0	0	0	0	0	0	0	0	0	0	1	1	0	0	1	1	0	1
365	0	0	0	2	0	0	0	0	0	0	1	1	1	0	0	1	1	1	0	0	2	0	0	1	0	0	0	0	0	0	2	0	0	0	0	0	0	0	0	5	0	1	1	0	0	1	1	1	1
366	0	0	0	1	0	0	0	0	1	0	0	1	1	1	1	1	1	1	0	1	0	0	0	0	1	0	1	1	1	0	1	0	0	0	1	0	0	0	0	0	0	0	0	0	0	1	1	1	1
367	1	1	1	1	0	1	0	0	0	1	0	0	0	1	1	0	0	0	0	1	1	0	0	1	0	0	1	1	0	0	1	0	0	0	0	0	0	1	0	0	0	0	0	0	0	1	1	1	1
368	0	0	0	2	0	0	0	0	0	0	1	1	1	0	0	1	1	1	0	0	2	0	0	1	0	0	0	0	0	0	2	0	0	0	0	0	0	0	0	0	0	1	1	0	0	1	1	0	1
370	0	0	0	2	0	0	0	0	0	1	0	0	0	1	1	0	0	0	1	0	0	0	0	1	0	0	0	0	1	0	1	0	1	1	0	0	0	5	0	0	0	0	0	0	0	1	1	0	1
371	0	0	0	2	0	0	0	0	0	0	1	1	1	0	0	1	1	1	0	0	2	0	0	1	0	0	0	0	0	0	2	0	0	0	0	0	0	0	0	0	0	1	1	0	0	1	1	1	1
372	1	1	1	0	0	1	0	0	0	0	0	1	1	1	1	1	1	1	0	0	1	0	0	1	1	0	0	0	1	0	1	0	0	0	0	0	0	1	1	1	1	1	1	0	0	1	1	0	1
375	1	1	1	1	0	1	0	0	0	1	0	0	0	1	1	0	0	0	0	1	1	0	0	2	0	0	0	0	0	0	1	0	0	0	0	0	0	0	0	0	0	0	0	0	0	1	1	0	1
376	0	0	0	1	0	0	0	0	1	0	0	1	1	1	1	1	1	1	0	1	0	0	0	0	1	0	0	0	2	0	0	0	0	0	1	0	0	0	0	0	0	0	0	0	1	1	1	0	1
378	0	0	0	2	0	0	0	0	0	1	0	1	1	0	0	1	1	1	1	0	1	0	0	1	0	0	0	0	0	0	2	0	0	0	0	0	0	0	0	0	0	1	1	0	0	1	1	0	1
379	0	0	0	2	0	0	0	0	0	0	1	1	1	0	0	1	1	1	0	0	2	0	0	1	0	0	0	0	0	0	1	0	0	1	0	0	5	1	0	0	0	1	0	0	0	1	1	0	1
380	0	0	0	1	0	0	0	0	0	1	0	1	1	0	0	1	1	1	0	1	0	0	0	2	0	0	0	0	1	0	0	0	1	1	0	0	0	0	0	0	0	1	0	0	0	1	1	0	1
381	0	0	0	2	0	0	0	0	0	0	1	1	1	0	0	1	1	1	0	0	2	0	0	1	0	0	0	0	0	0	2	0	0	0	0	0	0	0	0	0	0	1	1	0	0	1	1	0	1
382	0	0	0	2	0	0	0	0	0	0	1	0	0	1	1	0	0	0	0	0	1	0	0	1	0	0	0	0	1	0	2	0	1	0	0	0	0	5	0	0	0	0	1	0	0	1	1	0	1
383	0	0	0	2	0	0	0	0	0	0	1	0	0	1	1	0	0	0	0	0	1	0	0	1	0	0	0	0	1	0	2	0	1	0	0	0	0	0	0	0	0	1	1	0	0	1	1	0	1
685	0	0	0	1	0	0	0	0	1	0	0	0	0	1	1	0	0	0	1	0	1	2	0	1	0	0	0	0	1	0	0	0	2	0	0	0	0	0	0	0	0	0	2	0	1	1	1	0	1
686	0	0	0	0	0	0	1	0	0	0	1	1	1	0	0	1	1	1	1	0	1	2	0	1	0	0	0	0	1	0	1	0	2	0	0	0	0	0	0	0	0	0	2	0	1	1	1	0	1
384	0	0	0	2	0	0	0	0	0	1	0	1	1	0	0	1	1	1	0	1	0	0	0	1	1	0	0	0	1	0	0	0	2	0	0	0	5	0	0	0	0	0	0	0	1	1	1	0	1
385	1	1	1	1	0	1	0	0	1	0	0	0	0	2	2	0	0	0	0	0	1	0	0	1	0	0	0	0	1	0	1	0	0	0	1	0	0	0	0	0	0	0	0	0	0	1	1	0	1
387	0	0	0	2	0	0	0	5	0	1	0	1	1	0	0	1	1	1	0	1	1	0	0	1	0	0	1	1	0	0	1	0	0	0	0	0	0	0	0	0	0	1	0	0	0	1	1	0	1
687	1	1	1	1	0	1	0	2	5	0	1	1	1	0	0	1	1	1	0	2	1	1	0	1	0	0	0	0	1	0	2	0	1	1	0	0	5	0	0	0	0	1	1	0	1	1	1	1	1
758	1	1	1	0	0	1	0	1	0	0	1	1	1	0	0	1	1	1	0	1	1	1	0	0	0	0	0	0	1	0	1	0	0	1	0	0	0	0	1	1	0	0	1	0	1	1	1	0	1
388	0	0	0	2	0	0	0	0	0	0	1	0	0	1	1	0	0	0	0	0	1	0	0	1	0	0	0	0	1	0	1	0	1	0	0	0	0	0	0	0	0	0	1	0	0	1	1	0	1
389	0	0	0	2	0	1	0	0	0	0	0	1	1	1	1	1	1	1	0	0	1	0	0	1	0	0	1	1	1	0	1	0	0	0	1	0	0	0	0	0	0	1	0	0	0	1	1	1	1
391	0	0	0	1	0	0	0	0	1	0	0	1	1	1	1	1	1	1	0	1	0	0	0	0	1	0	1	1	2	0	0	0	0	0	1	0	0	0	0	0	0	0	0	0	1	1	1	0	1
392	0	0	0	1	0	1	0	0	1	0	0	0	0	2	2	0	0	0	0	0	1	0	0	1	0	0	0	0	1	0	1	0	0	0	1	0	0	0	0	0	0	0	0	0	1	1	1	0	1
480	0	0	0	1	1	1	0	1	0	0	0	2	2	0	0	1	2	2	0	1	0	1	0	0	1	0	0	0	0	0	1	0	1	1	1	0	0	0	0	0	0	1	0	0	1	1	1	0	1
688	0	0	0	1	0	0	0	0	0	1	0	1	1	0	0	1	1	1	0	2	0	0	0	0	1	0	1	1	2	0	0	0	0	0	1	0	0	0	0	0	0	0	0	0	1	1	1	0	1
689	1	1	1	1	0	1	0	0	0	0	0	0	0	2	2	0	0	0	0	0	1	0	0	2	0	0	0	0	0	0	2	0	0	0	0	0	0	0	0	0	1	2	0	0	0	1	1	0	1
394	0	0	0	1	0	0	0	0	1	0	0	1	1	1	1	1	1	1	0	1	0	0	0	0	1	0	0	0	2	0	0	0	0	0	1	0	0	0	0	0	0	0	0	0	1	1	1	0	1
395	0	0	0	2	0	0	0	0	0	0	1	0	0	1	1	0	0	0	0	0	1	0	0	1	0	0	0	0	1	0	2	0	1	0	0	0	0	0	0	0	0	0	1	0	0	1	1	0	1
396	0	0	0	2	0	0	0	0	0	1	0	0	0	1	1	0	0	0	1	0	0	0	0	1	0	0	0	0	1	0	1	0	1	1	0	0	0	2	0	0	0	0	0	0	0	1	1	0	1
662	5	5	5	0	2	2	0	2	0	1	0	1	1	0	0	1	1	1	0	0	0	0	0	1	0	0	0	0	0	2	1	0	1	1	1	0	0	0	0	0	1	0	1	0	0	1	0	0	0
254	0	0	0	1	0	0	0	0	0	1	1	1	1	1	1	0	1	1	0	0	2	0	0	0	0	0	0	0	1	1	0	1	1	0	1	0	0	0	1	1	0	0	0	1	0	1	1	0	1
255	0	0	0	2	0	0	0	0	0	0	0	1	1	1	1	0	1	1	0	1	0	1	0	0	0	0	0	0	0	0	1	0	0	0	1	0	1	0	1	1	0	0	1	1	0	1	1	1	1
262	1	1	1	1	1	1	0	0	0	1	0	1	1	0	0	1	1	1	0	2	1	2	0	1	0	0	0	0	1	0	0	0	0	1	0	0	0	0	0	0	0	0	1	0	1	1	1	0	1
263	1	1	1	1	0	1	0	0	0	0	1	1	1	0	0	0	1	1	0	1	1	1	1	0	0	0	1	1	0	0	1	0	0	2	0	0	1	0	1	1	0	0	1	1	1	0	0	0	0
265	0	0	0	1	0	0	0	0	0	0	0	0	0	2	2	0	0	0	0	2	0	1	0	1	0	0	0	0	0	0	0	0	1	0	0	0	1	0	1	1	0	0	1	1	0	1	1	1	1
266	5	5	5	0	0	1	0	0	0	0	0	1	1	1	1	1	1	1	0	1	1	1	0	2	0	0	0	0	1	1	2	0	0	1	0	0	0	0	0	0	0	0	2	0	2	0	0	0	0
690	0	0	0	1	0	0	0	0	0	0	0	1	1	0	0	1	1	1	1	0	2	1	0	1	1	0	1	1	0	0	1	0	1	1	0	1	0	0	0	1	0	1	0	0	0	1	1	0	1
635	5	5	5	1	0	1	0	0	0	0	0	2	2	0	0	2	2	2	0	1	0	1	0	1	1	0	0	0	2	0	0	0	1	1	1	0	0	1	1	1	0	0	0	1	1	1	1	1	1
691	0	0	0	2	0	0	0	0	0	0	1	2	2	0	0	2	2	2	1	0	0	0	0	1	1	0	0	0	1	0	0	0	1	0	0	0	0	0	0	0	0	0	0	1	1	1	1	0	1
624	0	0	0	1	0	0	0	0	0	0	0	1	1	1	1	1	1	1	0	0	0	0	1	0	0	0	1	1	0	0	1	0	1	0	1	0	1	0	0	0	0	0	2	0	0	1	1	0	1
634	0	0	0	0	0	0	1	0	0	0	1	1	1	0	0	1	1	1	1	0	1	2	0	1	0	0	0	0	1	0	1	0	2	0	0	0	0	0	0	0	0	0	2	0	0	1	1	0	1
613	0	0	0	2	0	0	0	0	0	0	0	1	1	1	1	1	1	1	0	0	0	1	1	0	1	0	0	0	1	0	1	0	1	0	0	0	2	0	0	0	0	0	1	0	1	1	1	1	1
692	0	0	0	2	0	0	0	0	0	0	0	1	1	1	1	1	1	1	0	1	0	0	0	0	1	0	1	1	1	0	0	0	1	1	0	0	0	0	1	1	0	0	0	1	1	1	1	1	1
703	0	0	0	1	0	0	0	0	1	1	0	0	0	2	2	0	0	0	0	0	1	0	0	0	1	1	0	0	1	1	1	0	0	0	1	0	0	2	1	1	0	0	1	1	1	1	1	0	1
704	0	0	0	0	0	0	0	0	0	0	0	0	0	0	0	0	0	0	0	2	2	0	0	0	1	0	0	0	1	1	5	5	0	0	0	0	0	5	0	0	1	2	0	0	1	1	1	0	1
706	0	0	0	1	0	0	0	0	0	2	0	0	0	0	0	0	0	0	0	2	2	0	0	1	0	0	0	0	0	1	0	1	0	0	0	0	0	2	0	0	1	1	1	0	1	1	1	0	1
707	0	0	0	1	0	0	0	0	0	1	0	1	1	1	1	1	1	1	0	1	0	1	0	1	0	0	0	0	1	0	1	0	0	0	0	0	2	0	1	1	1	1	1	0	1	0	0	1	0
708	0	0	0	1	0	0	0	0	0	1	0	0	0	1	1	0	0	0	0	1	1	0	0	1	0	0	0	0	2	0	1	1	0	0	0	0	0	0	1	1	1	1	0	1	0	0	0	0	0
709	0	0	0	0	0	0	1	0	0	1	1	1	1	0	0	1	1	1	1	1	1	0	0	0	0	0	0	0	2	0	1	1	1	0	0	0	0	1	0	0	1	1	1	0	0	1	1	0	1
710	0	0	0	1	0	0	0	0	1	2	0	0	0	1	1	0	0	0	0	1	2	0	0	0	0	0	0	0	2	0	1	1	0	0	0	0	0	0	1	1	1	1	0	1	0	1	1	0	1
712	0	0	0	2	0	0	0	0	0	0	0	1	1	1	1	1	1	1	0	1	1	0	0	1	1	0	1	1	2	0	1	0	0	0	0	0	0	1	1	1	0	0	0	1	0	1	1	0	1
713	0	0	0	0	0	0	1	0	0	1	1	1	1	0	0	1	1	1	1	1	1	0	0	0	0	0	1	1	2	0	1	1	1	0	0	0	0	0	0	0	1	1	1	0	0	1	1	0	1
615	1	1	1	0	1	1	0	0	0	1	0	1	1	0	0	1	1	1	0	1	1	1	0	2	0	0	0	0	1	0	0	0	0	1	0	0	0	0	0	0	0	1	0	0	0	1	1	1	1
651	1	1	1	1	1	1	0	0	0	2	0	0	0	0	0	0	0	0	0	2	1	1	0	2	0	0	0	0	0	0	0	0	1	0	0	0	0	0	0	0	0	0	0	0	0	1	1	0	1
658	0	0	0	1	0	0	0	0	0	0	1	1	1	0	0	1	1	1	0	1	1	1	0	1	0	0	0	0	1	0	0	0	0	2	0	0	1	0	1	1	0	1	0	1	0	1	1	0	1
714	0	0	0	1	0	0	0	0	0	0	1	1	1	0	0	1	1	1	0	1	1	1	0	1	0	0	1	1	0	0	0	0	1	1	0	0	2	0	1	1	0	0	0	1	0	1	1	0	1
656	0	0	0	1	0	0	0	0	0	0	1	2	2	0	0	2	2	2	0	1	1	1	0	1	0	0	1	1	1	0	0	0	0	2	0	0	1	0	0	1	0	1	0	1	0	1	1	0	1
644	0	0	0	1	0	0	0	0	0	1	0	0	0	0	1	0	0	0	2	0	0	0	0	1	0	0	0	0	1	0	0	0	1	1	1	0	0	0	1	1	0	0	0	1	1	1	1	0	1
617	0	0	0	1	0	0	0	0	0	1	0	0	0	1	1	0	0	0	0	1	0	1	0	1	0	0	1	1	0	1	1	0	0	0	0	0	0	5	0	0	1	1	0	0	0	1	1	1	1
715	0	0	0	1	0	0	0	0	0	1	0	1	1	0	0	1	1	1	0	0	2	1	0	2	0	0	0	0	0	1	2	0	0	1	0	0	0	0	0	0	1	2	0	0	0	1	1	0	1
659	0	0	0	1	0	0	0	0	0	1	0	0	0	1	1	0	0	0	0	1	0	1	0	2	0	0	0	0	0	1	1	0	0	1	0	0	0	2	0	0	1	1	0	0	0	1	1	0	1
609	1	1	1	1	0	1	0	0	0	0	0	2	2	0	0	1	2	2	0	0	1	0	1	1	0	0	1	1	0	0	2	0	0	1	0	0	0	0	0	0	0	1	1	0	1	1	1	0	1
526	0	0	0	1	0	1	0	0	0	0	0	2	2	0	0	1	2	2	0	0	1	0	1	1	0	0	1	1	0	0	2	0	0	1	0	0	0	0	0	0	0	1	1	0	1	1	1	1	1
618	1	1	1	1	0	1	0	0	0	1	0	1	1	0	0	1	1	1	0	2	1	1	0	2	0	0	0	0	1	0	1	0	0	1	0	0	0	1	0	0	0	0	1	0	0	1	1	0	1
716	1	1	1	1	0	1	0	0	0	0	0	2	2	0	0	1	2	2	0	0	1	0	1	1	0	0	1	1	0	0	2	0	0	1	0	0	0	0	0	0	0	1	1	0	1	1	1	0	1
525	1	1	1	1	0	1	0	0	0	0	0	2	2	0	0	1	2	2	0	0	1	1	1	1	0	0	0	0	0	0	2	0	0	1	0	0	0	0	0	0	0	1	1	0	1	1	1	1	1
655	0	0	0	2	0	0	0	0	0	0	1	1	1	0	0	1	1	1	0	1	2	1	0	1	0	0	1	1	0	0	1	0	0	1	0	0	2	0	1	1	0	1	0	1	0	1	1	1	1
524	0	0	0	2	0	0	0	0	0	0	1	1	1	0	0	1	1	1	0	1	2	1	0	1	0	0	1	1	0	0	1	0	0	1	0	0	2	0	1	1	0	1	0	1	0	1	1	1	1
660	0	0	0	2	0	0	0	0	0	0	1	1	1	0	0	1	1	1	0	1	2	1	0	1	0	0	0	0	0	0	1	0	0	1	0	0	2	0	1	1	0	1	0	1	0	1	1	1	1
643	0	1	0	1	0	0	1	0	0	0	0	1	1	1	1	0	1	1	1	1	0	1	0	0	0	0	1	1	0	0	1	0	1	1	1	0	0	0	1	1	0	0	0	1	0	1	1	0	1
632	1	1	1	1	0	1	0	0	0	0	0	2	2	0	0	0	2	2	1	1	1	1	1	0	0	0	1	1	0	0	1	0	0	1	0	0	2	0	0	0	0	0	2	0	0	0	0	0	0
633	0	0	0	2	0	0	0	0	1	1	0	1	1	0	0	0	1	1	0	1	0	1	0	1	0	0	1	1	0	0	0	0	0	1	0	0	0	0	0	0	0	0	0	0	0	1	1	0	1
619	0	0	0	2	0	0	0	0	0	5	0	2	2	0	0	2	2	2	0	0	2	1	0	1	0	0	1	0	0	1	1	0	1	0	0	0	0	0	1	1	0	1	0	1	0	1	1	0	1
607	0	0	0	0	1	0	0	1	0	1	0	1	1	0	0	0	1	1	0	1	0	1	0	0	0	0	0	0	1	0	0	2	0	0	0	1	0	0	1	1	0	0	1	1	1	1	1	0	1
72	0	0	0	1	0	1	0	0	0	1	0	1	1	0	0	1	1	1	0	1	2	2	0	1	0	0	1	1	1	0	1	0	0	1	2	0	0	1	1	1	0	0	1	1	1	1	1	1	1
620	0	0	0	1	0	0	0	0	0	0	1	1	1	1	1	0	1	1	0	5	0	0	1	0	1	1	0	0	1	0	1	0	0	1	0	0	1	0	1	1	0	0	1	1	1	1	1	0	1
73	1	1	1	0	1	1	0	0	0	1	1	0	0	1	1	0	0	0	0	1	2	0	0	1	0	0	0	0	0	1	1	0	1	1	1	0	0	0	0	0	1	0	1	0	1	1	1	0	1
74	0	0	0	1	0	0	0	0	0	1	1	1	1	0	0	0	1	1	0	1	1	0	0	0	1	1	0	0	0	0	1	0	0	1	0	0	0	0	0	0	0	0	0	1	1	1	1	1	1
657	0	0	0	1	1	1	0	0	0	0	1	2	2	0	0	2	2	2	0	1	2	0	0	0	0	0	0	0	1	1	0	2	1	1	0	0	0	0	0	0	0	0	1	0	1	1	1	0	1
717	0	0	0	2	0	0	0	0	0	1	1	1	1	1	1	0	1	1	0	1	0	0	0	0	1	1	0	0	1	0	1	0	0	1	0	0	0	0	1	1	0	0	1	0	0	0	0	2	0
653	0	0	0	0	0	0	0	0	5	0	1	0	0	0	0	0	0	0	5	5	0	0	0	1	1	1	0	0	0	1	0	0	0	0	0	1	0	5	5	5	5	1	0	1	1	1	1	1	1
718	0	0	0	0	0	0	0	0	0	0	0	0	0	1	1	0	0	0	0	1	1	0	0	1	0	0	0	0	0	1	1	0	0	1	1	0	0	5	2	2	0	0	1	1	1	1	1	1	1
719	0	0	0	1	0	0	0	0	1	0	1	0	0	1	1	0	0	0	0	0	0	1	0	1	0	0	1	1	1	1	0	0	0	1	0	0	0	0	0	0	1	1	0	0	1	1	1	0	1
720	5	5	5	0	1	1	0	5	5	0	2	0	0	0	0	0	0	0	0	0	0	2	0	5	0	0	0	5	5	5	5	5	5	5	5	5	0	5	5	5	5	0	0	2	0	2	2	0	2
616	5	5	5	1	0	1	0	0	0	1	1	1	1	1	1	0	1	1	0	1	1	0	0	2	0	0	0	0	1	0	0	1	0	1	0	0	1	0	1	1	0	0	1	1	0	1	1	0	1
721	5	5	5	0	1	1	0	1	0	0	2	0	0	0	0	0	0	0	0	0	0	2	0	0	5	2	0	0	0	0	0	0	0	1	0	0	1	0	2	2	0	0	0	2	1	1	1	1	1
639	0	0	0	1	0	0	0	0	0	0	1	1	1	1	1	0	1	1	0	0	0	0	1	0	1	1	0	0	1	0	1	0	0	2	0	0	0	0	1	1	0	0	0	1	1	1	1	0	1
722	1	1	1	0	0	1	0	5	5	0	0	2	2	0	0	2	2	2	0	0	1	0	0	0	5	0	0	0	1	0	0	0	0	0	1	0	0	1	1	1	0	1	0	1	0	1	1	0	1
723	0	0	0	2	0	0	0	0	1	1	0	0	0	2	2	0	0	0	0	0	1	0	0	1	1	0	0	0	0	0	1	0	0	1	0	0	2	0	1	1	0	2	0	0	0	1	1	1	1
661	1	1	1	0	1	1	0	5	0	2	0	5	5	5	5	5	5	5	5	5	5	5	0	0	0	0	0	0	2	0	0	0	5	5	5	5	5	0	5	5	5	0	0	0	0	2	2	0	2
724	0	0	0	2	0	0	0	0	0	0	1	1	1	1	1	0	1	1	0	1	0	0	1	0	0	0	1	0	0	0	2	0	1	1	1	0	0	0	0	0	1	1	1	0	0	1	1	0	1
725	0	0	0	1	0	0	0	0	0	0	1	5	5	5	5	5	5	5	0	2	0	0	0	1	0	0	0	0	1	0	0	0	0	0	0	0	0	0	0	0	0	0	1	0	1	0	0	1	0
726	0	0	0	0	0	0	0	0	0	0	1	1	1	0	1	0	1	1	1	0	0	0	0	0	0	0	0	0	0	1	1	0	1	1	0	0	0	0	1	1	0	0	1	1	1	1	1	0	1
636	1	1	1	1	0	1	0	0	0	1	0	0	0	1	1	0	0	0	0	1	1	1	0	1	0	0	0	0	0	0	1	0	0	1	0	1	1	0	1	1	0	0	2	0	1	1	1	0	1
727	0	0	0	0	0	0	0	0	0	1	1	0	0	0	0	0	0	0	0	0	1	2	0	1	1	0	0	0	2	0	0	0	1	2	0	1	0	0	0	0	0	1	0	0	1	1	1	1	1
728	0	0	0	1	1	0	0	1	0	0	0	0	0	1	1	0	0	1	0	1	0	0	0	1	1	0	0	0	0	0	0	0	0	1	0	0	0	0	1	1	1	1	1	0	0	1	1	0	1
627	1	2	1	0	0	1	1	0	0	1	0	0	0	0	0	0	0	1	1	0	0	1	0	0	1	0	0	0	2	0	0	0	1	1	0	0	0	2	0	0	1	1	0	0	0	0	0	0	0
729	0	1	0	0	0	0	1	0	0	0	1	0	0	0	0	0	0	1	1	0	1	1	0	0	1	1	0	0	2	0	0	0	0	1	0	0	1	2	1	1	0	0	2	0	0	1	1	0	1
730	0	0	0	0	0	0	0	0	0	2	0	0	0	0	0	0	0	0	0	1	1	1	0	0	0	0	0	0	0	2	0	0	1	2	0	1	1	2	0	0	1	1	1	0	1	1	1	0	1
731	1	1	1	0	1	1	0	2	0	1	1	0	0	0	0	0	0	0	0	1	0	0	0	1	0	0	0	0	1	0	0	0	1	1	0	0	1	0	0	0	1	1	0	0	0	0	0	2	0
732	0	0	0	0	0	0	0	0	0	1	0	1	1	0	0	1	1	1	0	0	0	1	0	1	0	0	1	0	1	1	0	0	1	1	1	0	0	0	0	0	0	0	1	0	0	1	1	0	1
733	0	0	0	0	0	1	0	0	0	1	0	1	1	1	1	1	1	1	0	1	1	1	0	1	1	1	0	0	1	1	1	0	1	1	1	1	0	0	0	0	0	0	1	0	0	1	1	0	1
734	1	1	1	0	0	1	0	0	0	1	0	1	1	1	1	1	1	1	0	1	1	1	0	1	1	1	0	0	1	0	1	0	0	1	1	1	0	0	1	1	0	0	1	0	0	0	0	0	0
735	1	1	1	0	0	1	0	0	0	0	1	1	1	0	0	1	1	1	0	0	0	2	0	0	1	1	0	0	0	1	0	1	1	1	0	1	1	5	0	0	1	1	0	0	1	1	1	1	1
736	0	0	0	0	0	0	0	0	0	0	0	2	2	0	0	2	2	2	0	2	0	1	0	1	0	0	0	0	1	0	0	0	0	1	1	0	0	1	0	0	1	1	1	0	0	1	1	1	1
737	5	5	5	0	0	1	0	0	0	0	0	0	0	2	2	0	0	0	1	1	0	0	1	1	0	0	0	0	1	1	0	0	0	1	0	0	0	1	1	1	1	1	1	0	1	1	1	0	1
738	2	2	2	0	2	2	0	2	0	0	2	0	0	0	0	0	0	0	0	0	1	0	0	1	1	1	0	0	1	1	0	0	0	2	0	0	0	0	0	0	1	1	1	0	0	0	0	0	0
739	1	1	1	0	1	0	0	1	0	1	0	0	0	1	1	0	0	0	0	1	1	2	0	0	1	1	1	0	1	1	0	0	0	0	0	0	0	5	0	0	0	0	0	0	1	1	1	0	1
740	1	1	1	0	0	1	0	0	0	0	0	1	1	0	1	0	1	1	0	0	1	1	0	1	0	0	0	0	0	1	0	0	0	0	0	0	1	0	1	1	0	0	0	1	0	1	1	1	1
741	1	1	1	1	0	1	0	0	0	1	0	1	1	1	1	0	1	1	0	1	2	0	0	2	0	0	0	0	1	1	1	0	0	1	1	0	1	0	2	2	0	1	0	1	0	1	1	0	1
742	0	0	0	2	0	1	0	0	0	0	0	2	2	0	0	1	2	2	0	0	2	0	0	1	0	0	0	0	1	0	0	0	0	1	1	0	0	5	2	2	0	0	0	2	0	1	1	0	1
743	0	0	0	0	0	1	0	0	0	0	0	2	2	0	0	0	2	2	0	0	2	0	0	0	0	0	0	0	1	0	0	0	0	0	0	0	0	0	2	2	0	0	0	2	1	1	1	0	1
744	0	0	0	0	0	0	0	0	0	0	1	1	1	0	0	1	1	1	0	1	2	0	0	1	0	0	1	0	1	0	1	0	0	2	0	0	0	0	0	0	0	0	1	0	0	1	1	0	1
745	1	1	1	0	0	1	0	0	0	0	0	2	2	0	0	1	2	2	0	0	1	0	0	1	0	0	0	0	1	0	1	0	0	0	0	0	0	0	2	2	0	0	1	1	0	1	1	0	1
746	0	0	0	2	0	0	0	0	0	0	0	1	1	1	1	1	1	1	1	1	1	0	0	2	0	0	0	0	1	0	1	0	0	2	1	0	0	0	2	2	0	0	0	1	0	1	1	0	1
747	0	0	0	2	0	0	0	0	0	0	0	0	0	0	0	0	0	0	1	1	1	0	0	1	1	0	0	0	1	0	2	0	0	2	1	0	0	0	1	1	0	0	0	1	1	1	1	1	1
748	5	5	5	0	0	2	0	0	0	0	0	1	1	0	0	0	1	1	0	0	1	0	0	1	0	0	0	0	1	0	1	0	0	1	1	0	0	0	2	2	0	0	0	2	0	1	1	0	1
749	0	0	5	1	1	1	0	1	0	0	0	2	2	0	0	1	2	2	0	1	0	0	0	0	0	0	0	0	0	0	1	0	1	1	0	0	0	0	2	2	0	0	0	2	1	0	0	0	0
750	1	1	1	1	0	1	0	0	0	0	1	1	1	0	0	0	1	1	1	1	0	0	0	2	0	0	0	0	1	1	1	0	0	1	1	0	0	1	1	1	1	1	0	1	0	0	0	1	0
751	0	0	0	1	0	0	0	0	0	0	0	2	2	0	0	2	2	2	0	0	1	1	0	1	1	0	0	0	0	0	0	0	0	1	2	0	0	0	1	1	0	0	0	1	1	1	1	0	1
752	0	0	0	1	0	0	0	0	0	0	0	2	2	0	0	2	2	2	0	1	1	0	0	1	1	0	0	0	1	0	0	0	0	1	0	0	1	0	1	1	0	0	1	1	0	1	1	0	1
753	0	0	0	2	0	0	0	0	0	5	0	2	2	0	0	2	2	2	0	2	1	0	0	2	0	0	0	0	0	0	1	0	0	1	0	0	1	0	2	2	0	0	0	2	1	1	1	0	1
754	0	0	0	1	0	0	0	5	0	0	0	1	1	1	1	1	1	1	1	1	0	0	0	1	0	0	0	0	0	0	0	0	0	1	0	0	1	0	0	0	0	0	1	0	5	0	0	0	0
755	2	2	2	0	2	2	0	1	1	2	0	0	0	1	1	0	0	0	0	5	1	1	0	1	1	1	0	0	1	0	0	1	2	1	0	1	0	0	1	1	0	1	0	1	1	1	1	1	1
424	0	1	0	1	0	0	1	0	1	0	0	1	1	1	1	0	1	1	1	1	0	1	0	1	0	0	1	1	1	0	0	0	1	2	0	0	0	0	1	1	0	0	1	0	0	0	0	0	0
756	1	1	1	1	1	0	0	1	1	0	1	0	0	1	1	0	0	0	0	0	0	1	0	1	0	0	1	1	2	0	0	0	1	1	0	0	0	0	1	1	0	0	1	0	1	1	1	0	1
425	0	1	0	1	0	0	1	0	5	5	0	2	2	0	0	1	2	2	0	0	0	1	0	0	1	0	1	1	0	0	0	0	1	1	0	0	0	0	0	0	0	0	1	0	0	1	1	0	1
757	0	0	0	1	0	0	1	0	1	0	1	1	1	1	1	1	1	1	1	1	0	1	0	0	0	0	0	0	2	0	1	0	1	0	0	0	0	0	1	1	0	0	1	1	0	1	1	0	1
429	0	0	0	2	0	0	0	0	2	0	0	1	1	1	1	0	1	1	1	0	0	1	0	1	0	0	0	0	1	0	0	0	0	1	0	0	0	0	0	0	0	0	1	0	1	1	1	0	1
629	0	0	0	0	0	0	1	0	0	0	1	1	1	0	0	1	1	1	1	0	1	1	0	1	0	0	0	0	1	0	1	0	2	0	0	0	0	0	0	0	0	0	2	0	1	1	1	1	1
621	0	0	0	0	0	0	0	1	0	1	1	0	0	0	0	0	0	0	0	2	1	1	0	0	1	0	0	0	1	0	0	0	0	1	1	0	0	1	0	0	0	0	1	0	1	1	1	0	1
461	0	0	0	0	0	0	0	1	1	0	1	0	0	2	2	0	0	0	0	1	1	1	0	0	1	0	0	0	1	0	0	0	0	1	0	0	0	0	0	0	0	0	0	0	1	1	1	0	1
465	0	0	0	1	1	1	0	2	5	0	0	0	0	1	1	0	0	0	0	0	0	1	0	0	1	1	0	0	0	1	0	0	0	0	5	5	0	0	0	0	0	0	1	0	1	1	1	0	1
468	1	1	1	1	1	1	0	1	0	0	1	0	0	0	0	0	0	0	0	1	0	0	0	0	1	1	0	0	1	1	0	1	0	2	0	1	0	0	1	1	0	0	0	1	1	1	1	0	1
642	1	1	1	1	1	1	0	1	0	0	0	0	0	1	1	0	0	0	0	1	0	0	0	0	1	1	0	0	0	1	0	0	0	0	0	0	0	0	0	0	0	0	1	0	1	1	1	0	1
474	1	1	1	1	1	1	0	1	0	0	1	0	0	0	0	0	0	0	0	1	0	1	0	0	1	1	0	0	0	1	0	1	0	1	0	1	0	0	1	1	0	0	0	1	1	1	1	0	1
484	0	0	0	2	0	0	0	0	0	0	1	0	0	0	0	0	0	0	0	2	1	1	0	0	0	0	1	0	0	0	1	0	1	0	1	0	1	0	1	1	0	0	1	1	0	1	1	0	1
759	1	1	1	1	0	1	0	0	0	0	0	2	2	0	0	1	2	2	1	0	1	0	0	0	1	0	0	0	0	0	1	0	0	1	2	0	0	0	1	1	0	0	1	1	0	1	1	0	1
760	2	2	2	0	0	2	0	0	0	0	0	1	1	1	1	0	1	1	5	5	1	0	0	0	1	0	1	1	0	0	1	0	0	0	0	0	0	0	5	5	5	0	1	1	0	1	1	0	1
761	0	0	0	2	0	0	0	0	0	0	0	1	1	1	1	1	1	1	0	1	0	0	0	0	1	0	1	1	0	1	0	0	0	0	1	0	0	0	1	1	0	0	1	1	0	1	1	0	1
762	0	0	0	1	0	1	0	0	1	0	0	1	1	1	1	0	1	1	0	0	1	0	0	1	0	0	0	0	2	0	1	0	0	2	1	0	0	0	2	2	0	0	1	1	0	1	1	0	1
486	0	0	0	2	0	0	0	0	0	0	0	1	1	0	0	1	1	1	0	0	1	0	0	0	0	0	0	0	0	0	1	0	2	0	0	0	0	0	1	1	0	0	1	0	1	1	1	0	1
488	0	0	0	1	0	0	0	0	0	0	0	2	2	0	0	1	2	2	1	0	0	0	0	1	0	0	0	0	0	0	1	0	2	1	0	0	0	0	1	1	0	0	1	0	1	1	1	0	1
490	0	0	0	1	0	0	0	0	0	0	1	1	1	1	1	0	1	1	0	1	0	0	0	2	0	0	0	0	1	0	1	0	1	0	1	0	0	0	0	0	1	1	1	0	0	0	0	0	0
623	0	0	0	1	1	1	0	1	0	0	0	0	0	1	1	0	0	0	0	0	1	1	0	0	1	1	0	0	0	1	1	1	0	1	0	2	0	0	1	1	0	0	1	1	0	1	1	0	1
500	2	2	2	0	1	2	0	1	0	0	0	0	0	2	2	0	0	0	0	0	1	1	0	1	1	1	0	0	0	1	1	0	0	0	0	0	0	0	0	0	0	0	1	0	1	1	1	0	1
504	0	0	0	1	0	0	0	0	0	1	1	0	0	0	0	0	0	0	0	1	1	0	0	1	1	1	1	1	1	0	0	0	0	1	0	0	0	0	1	1	0	0	0	1	1	1	1	0	1
506	0	0	0	2	0	0	0	0	0	1	0	0	0	0	0	0	0	0	0	1	0	0	0	1	0	0	1	1	1	0	1	0	1	0	0	0	0	5	0	0	0	0	0	0	0	1	1	0	1
507	0	0	0	2	0	0	0	0	0	2	0	1	1	0	0	1	1	1	0	1	0	0	0	1	0	0	1	1	0	0	0	0	1	0	0	0	0	1	1	1	0	0	1	0	1	1	1	0	1
509	0	0	0	2	0	0	0	0	0	0	0	1	1	0	0	1	1	1	0	1	1	0	0	0	1	0	0	0	0	0	0	0	0	1	0	0	0	0	0	0	0	0	0	0	1	1	1	0	1
510	0	0	0	1	0	0	0	0	0	0	1	1	1	0	0	1	1	1	0	1	2	1	0	0	1	0	0	0	0	0	0	0	0	1	0	0	0	0	0	0	0	0	0	0	1	1	1	0	1
625	0	0	0	1	0	0	1	0	0	0	1	1	1	1	1	1	1	1	1	1	1	2	0	0	0	0	0	0	1	0	1	0	1	0	0	0	0	0	0	0	0	0	2	0	0	1	1	0	1
626	0	0	0	2	0	0	0	0	2	0	0	0	0	2	2	0	0	0	1	1	1	1	0	0	0	0	0	0	1	0	1	0	1	0	0	0	0	0	0	0	0	0	2	0	0	1	1	0	1
515	0	0	0	0	0	0	1	0	0	0	1	1	1	0	0	1	1	1	1	0	1	2	0	1	0	0	0	0	1	0	1	0	2	0	0	0	0	0	0	0	0	0	2	0	1	1	1	1	1
516	0	0	0	0	0	0	1	0	0	0	1	1	1	0	0	1	1	1	1	0	1	2	0	1	0	0	0	0	1	0	1	0	2	0	0	0	0	0	0	0	0	0	2	0	1	1	1	0	1
645	0	0	0	1	0	0	0	0	1	0	0	0	0	1	1	0	0	0	1	0	1	2	0	1	0	0	0	0	1	0	0	0	1	0	0	0	0	0	0	0	0	0	2	0	1	1	1	0	1
764	0	0	0	1	0	0	1	0	0	1	1	1	1	0	0	1	1	1	1	1	0	0	0	1	0	0	0	0	1	0	1	0	1	0	0	0	0	1	0	0	0	0	1	0	0	1	1	0	1
444	0	0	0	1	0	0	0	0	0	0	1	1	1	0	0	1	1	1	0	1	1	1	0	0	0	0	0	0	1	0	0	0	0	0	0	0	0	0	1	1	0	0	1	0	1	1	1	0	1
765	0	0	0	2	0	0	0	0	0	0	0	0	0	2	2	0	0	0	0	1	0	1	0	1	0	0	0	0	1	0	1	0	1	1	0	0	0	0	1	1	0	1	0	1	0	1	1	1	1
652	0	0	0	2	0	0	0	0	0	0	0	0	0	2	2	0	0	0	0	1	0	1	0	1	0	0	1	1	1	0	1	0	1	1	0	0	0	0	1	1	0	1	0	1	0	1	1	0	1
606	0	0	0	2	0	0	0	0	0	0	1	0	0	1	1	0	0	0	0	0	1	1	1	0	0	0	1	1	0	0	2	0	0	0	0	0	1	0	0	0	0	0	2	0	0	1	1	0	1
628	0	0	0	2	0	0	0	0	0	1	0	0	0	1	1	0	0	0	0	1	1	0	0	1	0	0	0	0	2	0	1	0	2	0	1	0	0	0	0	0	0	0	1	0	0	1	1	0	1
766	0	0	0	2	0	0	0	0	2	1	1	1	1	0	0	1	1	1	1	1	1	0	0	1	0	0	0	0	1	0	2	0	1	0	0	0	0	0	0	0	0	1	1	0	0	1	1	0	1
711	0	0	0	1	0	0	0	0	5	1	0	0	0	1	1	0	0	0	0	1	1	0	0	1	0	0	1	1	1	1	1	0	0	0	1	0	0	5	1	1	0	0	1	1	1	1	1	1	1
630	0	0	0	2	0	0	0	0	0	1	0	0	0	1	1	0	0	0	0	1	0	0	1	1	0	0	1	1	0	0	1	0	0	0	0	0	5	0	0	0	0	0	1	0	0	1	1	1	1
612	1	1	1	1	0	1	0	0	1	0	0	1	1	1	1	1	1	1	0	1	0	1	0	1	0	0	1	1	2	0	0	0	0	1	2	0	0	0	1	1	0	0	0	1	0	1	1	0	1
839	1	1	1	0	1	0	0	2	0	0	0	0	0	1	1	0	0	0	0	1	1	1	0	0	0	0	0	0	2	0	2	0	0	0	0	1	0	0	0	0	1	1	1	0	1	1	1	0	1
985	0	0	0	1	0	0	0	0	0	0	0	1	1	0	0	0	1	1	0	1	1	0	0	1	0	0	0	0	1	1	0	0	0	0	0	0	0	5	0	0	1	1	1	0	1	1	1	0	1
987	0	0	0	2	0	0	0	0	0	1	0	0	0	1	1	0	0	0	0	1	1	1	0	1	0	0	1	1	1	0	1	0	0	0	0	0	0	0	2	2	0	0	1	1	0	0	0	0	0
992	0	0	0	1	0	0	0	0	0	0	0	1	1	1	1	1	1	1	0	2	1	0	0	0	0	0	0	0	0	0	0	2	0	1	0	0	0	5	0	0	0	1	0	1	1	1	1	0	1
973	0	0	0	1	0	0	0	0	0	2	0	0	0	0	0	0	0	0	0	1	1	0	0	1	0	0	0	0	0	1	1	1	1	0	0	2	1	1	1	1	0	0	2	0	1	0	0	1	0
912	0	0	0	2	0	0	0	0	0	0	2	1	1	0	0	0	1	1	0	1	0	0	0	1	0	0	0	0	1	0	0	0	1	2	0	1	0	1	1	1	0	0	1	1	0	1	1	0	1
873	0	0	0	2	0	0	0	0	1	2	0	0	0	0	0	0	0	0	0	2	0	0	0	1	1	0	0	0	0	0	1	0	0	1	0	0	0	0	2	2	0	0	2	0	0	1	1	0	1
908	0	1	0	1	0	0	1	0	0	0	0	1	1	0	1	1	1	1	0	1	1	0	1	0	0	0	0	0	0	1	0	1	2	0	0	1	1	1	1	1	1	1	1	0	1	1	1	1	1
959	0	0	0	0	0	0	0	0	0	0	0	1	1	1	1	0	1	1	0	1	0	1	0	1	0	0	1	0	0	0	0	0	2	1	1	0	0	0	0	0	0	0	2	0	1	1	1	0	1
932	0	0	0	1	0	0	0	0	2	0	0	1	1	1	1	0	1	1	0	0	1	0	0	1	0	0	0	0	1	0	0	0	0	0	1	0	0	0	1	1	0	0	1	0	1	1	1	0	1
923	0	0	0	1	0	0	0	0	0	0	0	1	1	1	1	1	1	1	0	0	2	0	1	0	0	0	0	0	0	0	0	0	0	0	0	0	0	1	0	0	1	1	0	0	1	1	1	0	1
891	0	0	0	2	0	0	0	0	0	1	0	1	1	0	0	1	1	1	0	2	2	0	0	0	0	0	0	0	0	0	0	2	0	1	0	0	0	1	0	0	0	0	1	1	1	1	1	0	1
894	2	2	2	0	1	2	0	1	0	1	0	0	0	2	2	0	0	0	0	0	1	0	0	1	0	0	0	0	0	1	1	0	1	1	0	0	0	0	1	1	0	0	1	1	1	1	1	1	1
899	0	0	0	1	0	0	0	0	0	0	1	0	0	0	0	0	0	0	0	0	2	0	0	1	0	0	0	0	1	0	0	0	1	2	0	0	0	1	1	1	0	0	1	0	1	1	1	0	1
907	0	0	0	1	0	0	0	0	0	1	0	0	0	1	1	0	0	0	0	1	2	0	0	1	0	0	0	0	0	0	0	1	2	0	0	1	1	1	1	1	1	1	1	0	1	1	1	1	1
941	0	0	0	1	0	0	0	0	2	1	1	0	0	0	0	0	0	0	0	5	2	0	0	1	0	0	0	0	1	0	0	1	0	2	0	1	1	0	1	1	0	0	2	0	1	1	1	0	1
957	1	1	1	0	0	1	0	0	0	0	0	1	1	1	1	0	1	1	1	0	1	1	1	1	0	0	0	0	0	0	2	0	0	1	0	0	2	0	1	1	0	0	1	1	0	0	0	1	0
989	0	0	0	2	0	0	0	0	0	0	0	1	1	0	0	1	1	1	0	2	1	0	0	2	0	0	0	0	0	1	0	0	0	0	0	0	0	1	0	0	0	0	1	0	1	1	1	1	1
910	1	1	1	1	1	1	0	1	0	0	0	1	1	1	1	0	1	1	0	0	2	1	1	0	0	0	0	0	0	2	0	1	0	1	0	0	0	0	0	0	1	1	1	0	0	1	1	1	1
834	0	0	0	1	0	0	1	0	0	0	2	2	2	0	0	1	2	2	1	0	1	2	0	0	0	0	0	0	1	0	2	0	1	0	1	0	0	0	0	0	0	0	2	0	0	1	1	1	1
937	0	0	0	1	0	0	0	0	1	0	0	0	0	1	1	0	0	0	0	0	0	0	0	1	0	0	1	1	1	1	0	0	1	1	1	0	0	1	0	0	1	1	0	0	0	1	1	1	1
984	0	0	0	2	0	0	0	0	0	1	0	0	0	2	2	0	0	0	0	1	0	0	0	1	0	0	0	0	1	0	1	0	1	0	0	0	0	0	1	1	0	0	2	0	0	1	1	1	1
902	1	1	1	1	0	1	0	0	0	2	1	0	0	1	1	0	0	0	0	1	1	0	0	0	0	0	0	0	1	0	1	0	1	0	0	1	0	0	0	0	0	0	1	0	1	1	1	0	1
1006	0	0	0	1	0	0	0	0	0	0	1	1	1	0	0	1	1	1	0	1	1	1	0	1	1	0	1	0	0	1	0	1	1	1	0	0	0	1	0	0	0	1	1	0	0	0	0	1	0
998	0	0	0	2	0	0	0	0	1	1	0	0	0	2	2	0	0	0	0	0	1	0	0	1	0	0	1	1	2	0	2	0	0	0	0	0	0	1	1	1	0	0	1	1	1	1	1	1	1
930	0	0	0	1	0	0	0	0	2	0	0	1	1	1	1	0	1	1	0	0	1	0	0	1	0	0	1	1	1	0	0	0	0	1	0	0	0	0	2	2	0	0	2	0	1	1	1	0	1
1005	1	1	1	1	0	1	0	0	0	1	0	0	0	0	0	0	0	0	0	1	0	0	0	1	0	0	1	0	1	0	0	0	1	1	1	0	0	0	0	0	0	0	0	0	1	1	1	0	1
971	0	0	0	2	0	0	0	0	0	1	0	1	1	0	0	1	1	1	0	2	1	0	0	1	0	0	0	0	0	1	0	2	2	1	0	1	0	1	1	1	0	0	2	0	1	1	1	1	1
887	0	0	0	1	0	0	0	0	0	2	0	0	0	0	0	0	0	0	0	2	2	0	0	1	0	0	0	0	1	1	0	2	2	0	0	2	0	1	1	1	0	0	2	0	1	0	0	1	0
905	1	1	1	1	0	1	0	0	0	0	1	1	1	1	1	1	1	1	0	0	2	0	0	1	1	0	0	0	0	0	1	1	1	1	1	1	0	1	0	0	1	1	1	0	1	1	1	1	1
974	0	0	0	2	0	0	0	0	0	0	0	1	1	1	1	1	1	1	0	0	0	0	0	0	1	0	1	1	0	0	0	0	0	0	1	0	0	0	0	0	0	1	1	0	0	1	1	0	1
999	0	0	0	2	0	0	0	0	0	0	0	0	0	2	2	0	0	0	0	1	1	0	1	1	0	0	0	0	0	1	0	0	1	0	0	0	0	0	1	1	0	0	0	1	0	1	1	0	1
1002	0	0	0	1	0	0	0	0	1	1	0	0	0	2	2	0	0	0	0	0	1	0	0	0	1	1	0	0	1	1	1	0	0	0	1	0	0	1	1	1	0	0	1	1	1	1	1	1	1
964	0	0	0	1	0	0	0	0	0	0	1	2	2	0	0	2	2	2	0	2	2	1	0	0	0	0	0	0	1	0	0	0	1	1	0	0	0	0	1	1	0	0	1	0	1	1	1	0	1
919	0	0	0	0	0	0	0	0	0	0	0	0	0	1	2	0	0	0	1	0	1	1	0	0	1	1	0	0	0	1	0	0	1	2	0	1	0	0	1	1	0	0	0	1	1	1	1	1	1
909	1	1	1	1	1	1	0	1	0	0	0	1	1	0	0	1	1	1	0	0	0	0	0	0	0	0	0	0	1	1	0	2	0	2	1	0	0	1	1	1	0	0	0	1	1	1	1	1	1
935	0	0	0	1	0	0	0	0	1	0	0	2	2	0	0	1	2	2	0	0	1	0	0	1	0	0	0	0	0	0	0	0	1	0	0	0	0	0	2	2	0	0	2	0	1	1	1	1	1
904	0	0	0	1	0	0	0	0	1	1	0	0	0	1	1	0	0	0	0	1	2	0	0	2	0	0	0	0	0	1	0	1	1	0	0	0	0	1	0	0	1	1	1	0	1	1	1	1	1
1003	1	1	1	0	1	1	0	5	0	0	0	1	1	1	1	1	1	1	0	0	0	1	0	0	1	1	1	0	0	2	0	0	0	1	1	0	1	1	0	0	0	0	1	0	1	1	1	0	1
35	0	0	0	1	0	0	0	0	0	1	0	1	1	0	0	1	1	1	0	1	2	0	1	1	0	0	0	0	0	1	0	1	1	0	0	1	0	1	0	0	0	0	1	0	1	1	1	1	1
936	1	1	1	1	0	1	0	0	0	1	0	0	0	1	1	0	0	0	0	1	1	0	0	2	0	0	0	0	0	1	0	0	1	1	0	0	0	2	0	0	1	1	0	0	0	1	1	0	1
1004	1	1	1	1	0	1	0	0	0	1	0	1	1	0	0	0	1	1	1	0	0	1	0	1	0	0	1	0	1	0	1	0	2	2	1	0	0	0	0	0	0	0	0	0	1	1	1	0	1
975	0	0	0	0	0	0	0	0	0	2	0	1	1	1	1	1	1	1	0	2	0	0	0	0	0	0	0	0	2	0	0	2	1	1	0	0	0	1	0	0	0	0	2	0	0	1	1	0	1
868	0	0	0	1	0	0	0	0	1	0	0	1	1	1	1	1	1	1	0	1	1	0	0	1	0	0	0	0	2	0	0	0	0	1	1	0	0	0	2	2	0	0	2	0	0	1	1	1	1
942	0	0	0	2	0	0	0	0	0	0	1	1	1	0	0	1	1	1	2	0	0	0	0	1	0	0	0	0	0	1	1	0	0	1	2	0	0	1	1	1	0	1	0	1	1	0	0	0	0
838	2	2	2	0	1	1	0	2	0	0	0	0	0	2	2	0	0	0	0	0	1	2	0	0	0	0	0	0	1	0	0	0	0	2	0	0	0	0	0	0	0	0	1	0	1	1	1	0	1
867	0	0	0	1	0	0	0	0	1	1	0	0	0	1	1	0	0	0	0	0	0	0	0	0	1	0	0	0	1	0	1	0	0	0	0	0	0	0	2	2	0	0	2	0	1	1	1	1	1
995	1	1	1	1	0	1	0	0	1	0	0	1	1	1	1	0	1	1	1	1	1	0	1	1	0	0	0	0	1	0	1	0	0	2	0	0	1	0	1	1	0	0	2	0	0	1	1	0	1
978	0	0	0	0	0	1	0	0	0	0	0	2	2	0	0	1	2	2	0	1	2	0	0	0	1	0	0	0	1	0	0	0	1	0	0	0	0	0	2	2	0	0	1	1	1	1	1	0	1
976	0	0	0	1	0	0	0	0	0	1	0	1	1	0	0	1	1	1	0	1	1	0	0	1	0	0	0	0	1	1	0	0	0	1	1	0	0	0	1	1	0	0	0	1	0	1	1	0	1
972	0	0	0	0	0	0	0	0	0	2	0	0	0	1	1	0	0	0	0	2	2	0	0	0	0	0	0	0	2	0	1	1	0	1	1	0	1	0	1	1	0	0	2	0	1	1	1	0	1
698	0	0	0	0	0	0	0	0	0	0	0	2	2	0	0	2	2	2	0	0	1	1	0	1	0	0	0	0	0	0	0	0	0	1	0	0	1	0	1	1	1	1	0	1	1	0	0	1	0
981	0	0	0	0	1	1	0	1	0	1	0	1	1	0	0	1	1	1	0	1	0	1	0	1	1	1	0	0	1	0	0	0	0	1	0	0	1	1	1	1	0	1	1	0	0	1	1	0	1
965	0	0	0	2	0	0	0	0	0	0	0	1	1	0	0	1	1	1	0	2	1	0	0	0	1	0	0	0	0	0	0	0	0	1	0	0	0	0	0	0	0	0	0	0	1	1	1	0	1
980	1	1	1	0	0	1	0	0	0	1	1	0	0	0	0	0	0	0	0	1	2	1	0	2	0	0	0	0	0	0	1	0	0	0	0	1	0	1	0	0	0	0	0	1	1	1	1	0	1
970	0	0	0	2	0	0	0	0	1	0	0	2	2	0	0	1	2	2	0	0	1	0	0	1	1	0	0	0	1	0	0	0	0	0	0	0	0	0	1	1	0	1	1	0	1	1	1	1	1
988	0	0	0	1	0	0	1	0	0	1	2	1	1	0	0	1	1	1	0	1	0	1	0	1	0	0	1	1	1	0	1	0	0	0	0	1	0	0	1	1	0	0	0	1	0	1	1	1	1
702	0	0	0	1	0	0	1	0	0	0	1	1	1	1	1	1	1	1	1	0	0	1	0	1	0	0	1	1	2	0	2	0	1	0	0	0	0	0	1	1	0	0	1	1	0	1	1	0	1
836	2	2	2	0	1	2	0	2	0	0	1	1	1	0	0	1	1	1	0	0	0	1	0	1	0	0	0	0	1	0	1	1	1	0	0	0	1	0	0	0	0	0	1	0	0	1	1	0	1
911	1	1	1	1	1	0	0	1	0	0	0	1	1	1	1	1	1	1	0	1	1	0	1	0	0	0	0	0	0	1	0	0	0	2	0	0	0	0	0	0	0	0	1	0	1	1	1	1	1
880	0	0	0	2	0	0	0	0	0	0	0	1	1	1	1	1	1	1	0	1	2	0	0	1	0	0	0	0	1	1	0	2	2	0	0	0	0	0	0	0	0	0	0	0	1	1	1	0	1
870	0	0	0	2	0	0	0	0	0	0	0	1	1	0	0	1	1	1	0	1	1	0	0	0	1	0	0	0	1	0	1	0	0	1	0	0	0	0	0	0	0	0	1	0	1	1	1	1	1
843	2	2	2	0	0	2	0	1	0	0	0	2	2	0	0	2	2	2	1	1	2	1	0	1	0	0	1	0	0	1	1	0	0	1	0	0	0	0	2	2	0	0	0	2	0	0	0	1	0
700	0	0	0	2	0	0	0	0	0	2	0	0	0	1	1	0	0	0	0	2	1	0	0	0	0	0	0	0	1	0	1	0	0	0	0	0	0	0	2	2	0	0	2	0	0	0	0	1	0
994	0	0	0	1	0	0	0	0	0	1	0	0	0	1	1	0	0	0	0	1	1	1	0	1	0	0	1	1	2	0	1	1	0	0	0	0	0	1	1	1	1	1	0	1	0	0	0	1	0
996	0	0	0	1	0	0	0	0	0	0	0	0	0	2	2	0	0	0	0	0	1	0	0	1	1	1	0	0	0	1	0	0	0	0	1	0	0	1	0	0	0	0	1	0	1	1	1	0	1
961	0	0	0	1	0	0	0	0	0	1	0	1	1	0	0	1	1	1	0	1	1	0	0	1	0	0	1	1	1	1	0	0	0	1	1	0	0	0	1	1	0	0	0	1	0	1	1	0	1
920	0	0	0	1	0	0	0	0	0	0	1	0	0	0	1	0	0	0	1	0	0	0	0	1	0	0	0	0	1	0	0	1	0	1	1	0	0	0	0	0	0	0	2	0	1	1	1	0	1
812	0	0	0	0	0	0	0	0	0	1	0	1	1	0	0	1	1	1	0	2	1	0	1	0	0	0	0	0	1	0	0	1	1	1	0	0	0	0	1	2	0	0	1	0	0	1	1	0	1
958	0	0	0	0	0	0	0	0	0	0	0	1	1	1	1	0	1	1	0	1	0	1	0	2	0	0	0	0	0	0	1	0	1	1	1	0	1	0	1	1	0	0	1	1	0	1	1	1	1
1007	0	0	0	1	0	0	0	0	0	1	1	0	0	1	1	0	0	0	0	2	2	0	0	0	0	0	0	0	0	1	0	1	1	1	0	1	1	0	0	0	2	2	0	0	1	1	1	1	1
896	2	2	2	0	0	2	0	0	0	2	0	0	0	2	2	0	0	0	0	2	2	0	0	2	0	0	0	0	1	0	2	0	0	1	0	0	0	1	1	1	0	0	1	1	1	1	1	1	1
926	0	0	0	0	0	0	0	0	1	1	0	1	1	0	0	1	1	1	0	1	1	0	1	0	0	0	0	0	0	0	0	1	0	1	0	1	1	1	0	0	0	0	1	0	1	1	1	0	1
960	0	0	0	1	0	0	0	0	0	0	0	2	2	0	0	2	2	2	0	1	0	0	0	1	0	0	0	0	0	1	0	0	1	0	1	0	0	0	1	1	0	0	0	1	0	1	1	0	1
914	0	0	0	2	0	0	0	0	0	5	0	2	2	0	0	2	2	2	0	2	0	0	0	0	0	0	0	0	0	2	0	0	1	1	0	0	0	1	1	1	0	1	0	1	1	1	1	1	1
900	0	0	0	1	0	0	0	0	0	0	1	0	0	0	0	0	0	0	0	0	2	0	0	0	0	0	0	0	1	0	0	0	1	1	0	0	0	0	2	2	0	0	2	0	1	1	1	0	1
876	0	0	0	1	0	0	0	0	0	1	1	1	1	1	1	1	1	1	1	1	1	0	0	1	0	0	1	1	1	0	1	0	1	1	1	0	0	0	0	0	0	1	1	0	1	1	1	0	1
877	0	0	0	2	0	0	0	0	0	0	0	2	2	0	0	2	2	2	0	1	1	0	0	0	1	0	1	1	1	0	0	0	1	0	0	0	0	1	0	0	0	0	0	0	0	1	1	0	1
881	0	0	0	1	0	0	0	0	1	1	1	1	1	1	1	1	1	1	0	1	1	0	0	1	0	0	0	0	0	0	0	2	0	0	0	0	0	1	0	0	0	0	1	0	1	1	1	1	1
875	0	0	0	0	0	0	1	0	0	2	0	2	2	0	0	0	2	2	2	0	0	1	0	0	0	0	0	0	0	0	0	2	2	2	2	0	0	0	0	0	0	1	0	0	0	0	1	1	1
938	1	1	1	1	1	1	0	1	0	0	0	2	2	0	0	2	2	2	0	1	1	0	1	1	0	0	1	0	0	0	0	1	1	1	1	0	1	0	0	0	1	1	1	0	0	1	1	0	1
929	0	0	0	1	0	0	0	0	2	0	0	1	1	1	1	0	1	1	0	0	1	0	0	1	0	0	1	1	1	0	0	0	0	1	0	0	0	0	2	2	0	0	2	0	1	1	1	1	1
879	0	0	0	2	0	0	0	0	0	0	1	2	2	0	0	2	2	2	2	0	1	0	0	0	0	0	0	0	2	0	1	1	1	0	0	0	0	0	1	1	0	0	1	0	1	0	0	0	0
963	0	0	0	1	0	0	0	0	0	1	0	1	1	1	1	0	1	1	0	1	1	0	0	1	0	0	1	1	1	1	1	0	0	1	1	0	0	0	2	2	0	0	0	2	1	1	1	0	1
977	0	0	0	2	0	0	0	0	0	1	0	1	1	0	0	1	1	1	0	1	0	0	0	1	1	0	1	1	1	0	0	0	0	0	2	0	0	0	1	1	0	0	0	1	1	1	1	0	1
849	2	2	2	0	1	2	0	1	0	1	0	1	1	0	0	1	1	1	0	0	0	1	0	0	1	1	0	0	0	1	0	0	1	2	0	2	0	0	0	0	1	1	0	0	0	1	1	1	1
979	1	1	1	1	1	1	0	1	0	0	0	2	2	0	0	2	2	2	0	1	2	0	0	2	0	0	0	0	1	1	1	0	1	0	0	0	2	0	1	1	0	0	0	1	0	1	1	0	1
956	0	1	0	1	0	0	1	0	1	0	0	1	1	1	1	1	1	1	1	1	1	2	0	0	0	0	0	0	1	0	1	0	1	1	0	0	1	0	0	0	0	0	2	0	0	1	1	0	1
869	1	1	1	0	1	0	0	0	0	1	0	1	1	1	1	1	1	1	0	1	1	0	0	0	1	0	0	0	1	0	1	0	1	0	1	0	0	0	1	1	0	1	0	1	1	1	1	0	1
924	0	0	0	1	0	0	0	0	0	2	1	0	0	0	0	0	0	0	0	1	1	0	0	1	0	0	0	0	0	1	0	2	1	1	0	2	1	1	0	0	0	0	1	0	1	1	1	0	1
828	0	0	0	1	0	0	0	0	0	1	1	1	1	0	0	0	1	1	0	1	0	0	0	2	0	0	0	0	1	1	1	0	1	2	1	1	0	2	0	0	0	0	1	0	1	1	1	0	1
901	0	0	0	1	0	0	0	0	0	1	0	0	0	1	1	0	0	0	0	2	1	0	0	1	0	0	0	0	1	0	1	1	2	1	1	1	1	1	1	1	0	0	2	0	1	0	0	0	0
927	0	0	0	2	0	0	0	0	0	1	1	1	1	0	0	1	1	1	1	1	1	0	0	2	0	0	0	0	0	1	0	1	1	0	0	1	0	1	0	0	0	0	1	1	1	1	1	0	1
931	0	0	0	1	0	0	0	0	0	0	0	2	2	0	0	2	2	2	0	1	0	0	0	0	5	0	0	0	1	0	0	0	1	0	1	0	0	0	0	0	0	0	1	0	0	1	1	1	1
835	0	0	0	1	0	0	0	0	0	0	0	0	0	2	2	0	0	0	0	5	2	0	0	2	0	0	0	0	1	0	2	0	1	1	0	1	0	1	0	0	1	1	1	0	1	1	1	0	1
701	0	0	0	0	0	0	0	0	0	1	0	0	0	1	1	0	0	0	0	1	1	0	0	0	1	1	0	0	1	1	0	1	0	0	1	0	0	2	0	0	1	1	1	0	0	1	1	1	1
831	0	0	0	0	0	0	0	0	0	0	0	0	0	0	2	0	0	0	0	2	0	0	0	0	0	0	0	0	2	0	0	2	0	1	0	1	1	0	0	0	1	1	0	0	0	1	1	0	1
915	0	0	0	1	0	0	0	0	0	0	0	1	1	1	1	1	1	1	0	2	0	0	0	0	0	0	0	0	0	1	0	0	1	2	1	0	0	2	1	1	0	1	0	1	1	1	1	1	1
850	5	5	5	0	1	1	0	1	0	0	1	1	1	0	0	1	1	1	0	0	1	1	0	1	1	1	1	0	0	2	0	1	0	2	0	0	1	0	0	0	0	0	1	0	0	1	1	1	1
934	0	0	0	1	0	0	0	0	1	0	0	2	2	0	0	1	2	2	0	0	1	0	0	1	0	0	0	0	0	0	0	0	1	0	0	0	0	0	2	2	0	0	2	0	1	1	1	0	1
893	0	0	0	0	0	0	0	0	0	0	0	0	0	2	2	0	0	0	0	5	0	0	2	0	0	0	0	0	2	0	2	0	0	2	0	0	0	0	2	2	0	0	0	2	1	0	0	0	0
969	0	0	0	2	0	0	0	0	0	0	1	2	2	0	0	1	2	2	0	1	1	0	0	1	0	0	1	1	0	0	2	0	0	1	1	0	0	0	0	0	0	1	1	0	0	1	1	1	1
853	0	0	0	0	0	0	0	0	0	0	1	2	2	0	0	0	2	2	0	0	0	0	0	1	0	0	0	0	2	0	1	0	0	0	0	0	0	0	1	1	1	1	0	1	1	1	1	0	1
916	1	1	1	0	1	1	0	1	0	1	0	0	0	1	1	0	0	0	0	0	0	0	0	0	0	0	0	0	1	0	0	0	1	2	0	1	0	1	1	1	1	1	1	0	1	1	1	1	1
933	0	0	0	1	0	0	0	0	2	0	0	1	1	1	1	0	1	1	0	0	1	0	0	1	0	0	1	1	0	0	0	0	0	0	0	0	0	1	1	1	0	0	1	0	1	1	1	1	1
866	1	1	1	1	1	1	0	1	0	0	0	1	1	1	1	1	1	1	0	0	2	0	0	2	0	0	0	0	1	0	0	0	1	0	0	0	0	0	2	2	0	0	2	0	1	1	1	0	1
830	0	0	0	0	0	0	0	0	0	1	1	1	1	0	1	1	1	1	0	0	0	1	0	2	0	0	0	0	1	1	0	0	0	2	0	0	0	1	1	1	1	1	1	0	1	1	1	1	1
882	0	0	0	0	0	0	0	0	0	1	1	2	2	0	0	2	2	2	0	1	2	0	0	1	0	0	0	0	1	0	0	1	2	2	0	0	0	0	1	1	0	0	1	1	1	1	1	0	1
895	0	0	0	0	0	0	0	0	0	0	0	1	1	1	1	1	1	1	0	1	1	0	0	1	0	0	0	0	0	0	0	2	0	2	0	0	0	0	2	2	0	0	2	0	1	1	1	0	1
874	0	0	0	1	0	0	0	0	0	0	0	1	1	0	0	1	1	1	0	0	0	0	0	2	0	0	0	0	1	0	1	0	0	1	0	0	0	0	1	1	0	0	0	1	0	1	1	0	1
928	0	0	0	2	0	0	0	0	0	1	1	1	1	0	0	1	1	1	2	0	2	0	0	2	0	0	0	0	0	1	0	1	1	0	0	1	1	1	1	1	0	0	2	0	1	1	1	1	1
997	1	1	1	1	0	1	0	1	1	0	1	1	1	0	0	1	1	1	0	1	2	0	0	0	1	0	0	0	1	1	0	1	1	0	0	1	0	1	0	0	0	0	1	0	1	0	0	1	0
991	0	0	0	1	0	0	0	0	0	1	0	0	0	1	1	0	0	0	0	1	1	0	0	0	1	1	0	0	0	1	0	1	0	1	1	0	0	1	0	0	0	0	2	0	1	1	1	0	1
983	0	0	0	1	0	0	0	0	1	1	0	1	1	1	1	0	1	1	0	0	1	0	0	0	0	0	0	0	2	0	1	0	0	0	0	0	0	5	1	1	1	1	0	1	1	1	1	1	1
851	1	1	1	0	0	1	0	0	0	1	1	0	0	0	0	0	0	0	0	0	1	1	0	1	0	0	1	0	1	1	0	1	1	2	1	0	0	0	0	0	0	0	1	0	1	1	1	0	1
1000	0	0	0	1	0	0	1	5	1	1	1	1	1	1	1	1	1	1	1	0	1	0	0	0	0	0	1	1	2	0	2	0	1	0	0	0	0	0	1	1	0	0	1	1	0	1	1	0	1
982	1	1	1	0	0	1	0	0	0	0	0	1	1	0	1	1	1	1	0	0	1	1	0	2	0	0	0	0	1	1	0	0	1	1	1	0	0	2	1	1	1	1	0	1	0	1	1	0	1
967	0	0	0	2	0	0	0	0	0	0	0	2	2	0	0	1	2	2	1	0	0	0	0	2	0	0	0	0	0	0	1	0	2	1	0	0	0	0	0	0	0	0	1	0	0	1	1	0	1
993	1	1	1	0	0	1	0	1	0	1	0	1	1	0	0	1	1	1	0	2	2	0	0	1	0	0	1	0	1	0	0	1	0	0	0	0	0	1	1	1	1	1	0	1	0	0	0	0	0
883	0	0	0	1	0	0	0	0	0	1	0	1	1	1	1	1	1	1	0	2	2	0	0	0	0	0	0	0	1	0	0	0	1	2	0	1	0	1	0	0	0	0	0	0	0	2	2	0	2
921	0	0	0	1	0	0	0	0	0	1	1	0	0	0	0	0	0	0	0	0	0	0	0	0	1	1	0	0	0	0	0	0	1	2	0	0	0	0	0	0	0	1	1	0	0	1	1	1	1
1001	0	0	0	1	0	0	0	0	1	2	0	0	0	1	1	0	0	0	0	1	2	0	0	0	0	0	0	0	1	1	1	0	0	0	1	0	0	1	1	1	0	0	1	1	1	1	1	0	1
699	0	0	0	2	0	0	0	0	1	1	0	0	0	1	1	0	0	0	0	1	2	0	0	1	0	0	0	0	1	1	1	0	0	0	0	0	0	1	1	1	0	0	1	1	1	1	1	1	1
897	0	0	0	0	0	0	0	0	0	1	0	1	1	1	1	1	1	1	0	1	1	0	0	0	0	0	0	0	2	0	0	2	0	2	0	0	0	1	0	0	0	0	2	0	1	0	0	0	0
884	0	0	0	0	0	0	0	0	1	1	0	1	1	0	0	0	1	1	0	2	0	0	0	1	0	0	0	0	0	0	2	0	1	0	0	0	0	0	0	0	1	1	1	0	1	1	1	0	1
986	0	0	0	1	0	0	1	0	0	1	1	1	1	1	1	1	1	1	2	0	0	1	0	0	0	0	1	1	2	0	2	0	1	0	0	0	0	0	1	1	0	0	2	0	0	1	1	1	1
968	0	0	0	2	0	0	0	0	0	0	1	2	2	0	0	1	2	2	0	2	0	1	0	0	1	0	0	0	0	0	1	0	1	1	1	0	0	1	0	0	0	1	1	0	0	1	1	0	1
878	0	0	0	2	0	0	0	1	0	0	0	1	1	1	1	1	1	1	0	1	1	0	0	2	0	0	0	0	0	0	0	0	0	0	0	0	0	0	1	1	0	0	1	0	1	1	1	0	1
886	0	0	0	0	0	0	0	0	1	0	0	0	0	2	2	0	0	0	0	1	0	0	0	2	0	0	0	0	0	0	0	2	0	0	0	0	1	1	0	0	0	0	1	0	1	1	1	0	1
903	0	0	0	1	0	0	0	0	1	1	0	0	0	1	1	0	0	0	0	1	2	0	1	0	0	0	0	0	0	0	1	1	1	1	0	1	0	0	1	1	0	0	1	0	0	0	0	1	0
846	0	0	0	0	0	0	0	0	0	0	0	1	1	1	1	1	1	1	0	0	1	1	0	1	1	1	1	0	2	0	0	0	1	2	0	0	1	1	1	1	1	1	0	1	1	1	1	0	1
888	0	0	0	0	0	0	0	0	0	0	2	0	0	0	0	0	0	0	0	0	2	1	0	1	0	0	0	0	0	0	2	0	0	0	0	2	1	2	2	2	0	0	1	1	1	1	1	0	1
889	1	1	1	0	1	1	0	0	0	2	1	1	1	0	0	1	1	1	0	1	1	0	0	2	0	0	0	0	0	0	0	1	1	1	0	2	1	1	0	0	0	0	2	0	1	1	1	1	1
990	0	0	0	2	0	0	0	1	1	1	0	0	0	2	2	0	0	0	0	0	2	0	0	1	0	0	0	0	1	0	1	0	0	0	0	0	0	0	1	1	0	0	0	1	1	1	1	1	1
[truncated: 2,530 more columns]
